# Supplementary material for: Effect of weight change and lifestyle modifications on the development or remission of nonalcoholic fatty liver disease: sex-specific analysis
Source: PubMed Central journal article supplement (PMC6965633; doi:10.1038/s41598-019-57369-9), 2020-01-16
Supplement: 41598_2019_57369_MOESM1_ESM.pdf [file 41598_2019_57369_MOESM1_ESM.pdf]

## **Supplementary information**

### **Effect of weight change and lifestyle modifications on the development or remission of nonalcoholic fatty liver disease: sex-specific analysis**

#### **Authors:**

Naoki Yoshioka <sup>1,2</sup>, Masatoshi Ishigami <sup>1\*</sup>, Yasuko Watanabe <sup>3</sup>, Hajime Sumi <sup>2</sup>, Masao Doisaki <sup>2</sup>, Takeo Yamaguchi <sup>2</sup>, Takanori Ito <sup>1</sup>, Yoji Ishizu <sup>1</sup>, Teiji Kuzuya <sup>1</sup>, Takashi Honda <sup>1</sup>, Tetsuya Ishikawa <sup>1</sup>, Jun-ichi Haruta <sup>2</sup>, and Mitsuhiro Fujishiro <sup>1</sup>

#### **Affiliations:**

<sup>1</sup> Department of Gastroenterology and Hepatology, Nagoya University Graduate School of Medicine, 65 Tsuruma-cho, Showa-ku, Nagoya, 466-8550, Japan. Tel: +81-52-744-2169; <sup>2</sup> Department of Gastroenterology and Hepatology, Japanese Red Cross Nagoya Daiichi Hospital, 3-35, Michishita-cho, Nakamura-ku, Nagoya, 453-0046, Japan. Tel: +81-52-481-5111; <sup>3</sup> Health control Center, Japanese Red Cross Nagoya Daiichi Hospital, 3-35, Michishita-cho, Nakamura-ku, Nagoya, 453-0046, Japan. Tel: +81-52-481-5111

#### **\*Corresponding author:**

Masatoshi Ishigami, Nagoya University Graduate School of Medicine, 65 Tsuruma-cho, Showa-ku, Nagoya, 466-8550, Japan. Tel: +81-52-744-2169; Fax: +81-52-744-2178. E-mail: masaishi@med.nagoya-u.ac.jp

**Supplementary Table S1. Biochemical parameters associated with NAFLD development or remission.**

|                 | Association of NAFLD development<br>(n = 937) |            |         | Association of NAFLD remission<br>(n = 484) |           |         |
|-----------------|-----------------------------------------------|------------|---------|---------------------------------------------|-----------|---------|
|                 | AOR                                           | 95% CI     | p value | AOR                                         | 95% CI    | p value |
| AST change      | 0.99                                          | 0.90–1.09  | 0.829   | 1.12                                        | 1.01–1.23 | 0.025   |
| ALT change      | 1.06                                          | 1.01–1.10  | 0.019   | 0.99                                        | 0.97–1.02 | 0.540   |
| Platelet change | 1.00                                          | 0.99–1.00  | 0.578   | 1.00                                        | 0.99–1.01 | 0.538   |
| APRI change     | 0.29                                          | 0.00–87.40 | 0.674   | 0.00                                        | 0.00–0.15 | 0.011   |
| CRP change      | 1.33                                          | 0.79–2.23  | 0.284   | 0.75                                        | 0.48–1.15 | 0.181   |
| FLI change      | 1.05                                          | 1.03–1.08  | <0.001  | 0.96                                        | 0.94–0.98 | <0.001  |

Multivariate analysis was performed using a logistic regression model, adjusted for all other factors in the table. ALT, alanine aminotransferase; AOR, adjusted odds ratio; APRI, aspartate aminotransferase to platelet ratio index; AST, aspartate aminotransferase; CRP, C-reactive protein; FLI, fatty liver index; NAFLD, nonalcoholic fatty liver disease.
